# Supplementary material
Source: PubMed Central journal article supplement (PMC2649406)
Supplement: pp.108.131797_1.pdf [file pp.108.131797_1.pdf]

SUPPLEMENTAL INFORMATION

**Figure S1.** DNA ploidy level distribution upon infection of *dell-1* (A), *E2Fe/DEL1<sup>OE</sup>* (B), *ccs52a2* (C), *SIM<sup>OE</sup>* (D), and wild-type Col-0 plants (E) at 24 dpi.

A, *dell-1* knockout plants displayed normal symptomatology, but the amount of cells with a 2C content was 8% lower than that of wild-type controls. B, Plants overexpressing *E2Fe/DEL1* on the other hand developed the regular symptoms, but here the number of cells with a 2C content was 2.5% higher than that of wild-type controls. C, The *ccs52a2* knockout mutant developed wild-type symptoms and symptomatic leaf cells exhibited the typical ploidy level distribution. Nevertheless, compared with infected wild types, the number of cells with a 2C content was 7% higher. *SIM*-overexpressing plants had lower CDKA activity and enhanced endoreduplication but also developed symptoms similar to those of wild-type plants. The 2C level in the symptomatic leaves was 10% lower than that of the wild type and no cells with a 64C content were counted upon infection. These data indicate that the *E2Fe/DEL1/CCS52A2* and the *SIM* pathways are not significantly involved in controlling CDK activity in symptomatic leaves. However, the modest alterations that are measured in the mutants might indicate that in a wild-type background these regulators play a role as a negative feedback system in an attempt to counter the *R. fascians* effect.

**Supplemental Table SI.** Primers used in qRT-PCR amplification

| Gene             | Forward primer(5'-3')       | Reverse primer(5'-3')     | Reference                  |
|------------------|-----------------------------|---------------------------|----------------------------|
| <i>ACT2</i>      | GGCTCCTCTTAACCCAAAGGC       | CACACCATCACCAGAATCCAGC    | Depuydt et al. (2008)      |
| <i>CYCD3;1</i>   | CGTTCGTAGACCACATTATCAGGAG   | CGGAGATTACAGAGAGGAGGAGAC  | E. Russinova (unpublished) |
| <i>CYCD3;2</i>   | CGTTCGTAGACCACATTATCAGGAG   | AAGTACCTCATAAACCTCGTATCAG | E. Russinova (unpublished) |
| <i>CYCD3;3</i>   | TTAGCCACTGCAATAATGGTCTCTG   | CTGAATGACGCATCAAACACACC   | E. Russinova (unpublished) |
| <i>CDKB1;1</i>   | GGTGGTGACATGTGGTCTGTTGG     | CGCAGTGTGAAACACCCGG       | Boudolf et al. (2004a)     |
| <i>CDKA</i>      | CCTAGGATCTCATCATTACTCTACACC | CCATGTATCCTCGTACGGAGTTCC  | This work                  |
| <i>CYCA2;3</i>   | AGGCACAGATAACACAGCTG        | TGAGGTAGAGAGTGTGTCAGATGC  | Imai et al. (2006)         |
| <i>E2Fe/DEL1</i> | GGTTAGGGTACAATGGTGAGCC      | CTCTGTAGCGTTTTCTTGGGACG   | Lammens et al. (2008)      |

**Boudolf V, Vlieghe K, Beemster GTS, Magyar Z, Torres Acosta JA, Maes S, Van Der Schueren E, Inzé D, De Veylder L** (2004) The plant-specific cyclin-dependent kinase *CDKB1;1* and transcription factor *E2Fa-DPa* control the balance of mitotically dividing and endoreduplicating cells in *Arabidopsis*. *Plant Cell* **16**: 2683-2692

**Depuydt S, Doležal K, Van Lijsebettens M, Moritz T, Holsters M, Vereecke D** (2008) Modulation of the hormone setting by *Rhodococcus fascians* results in ectopic *KNOX* activation in *Arabidopsis*. *Plant Physiol* **146**: 1267-1281

**Imai KK, Ohashi Y, Tsuge T, Yoshizumi T, Matsui M, Oka A, Aoyama T** (2006) The A-type cyclin *CYCA2;3* is a key regulator of ploidy levels in *Arabidopsis* endoreduplication. *Plant Cell* **18**: 382-396

**Lammens T, Boudolf V, Kheibarshekan L, Zalmas LP, Gaamouche T, Maes S, Vanstraelen M, Kondorosi E, La Thangue NB, Govaerts W, Inzé D, De Veylder L** (2008) Atypical E2F activity restrains APC/CCCS52A2 function obligatory for endocycle onset. *Proc Natl Acad Sci USA* **105**: 14721-14726
